# Supplementary material for: Absorption spectra of benzoic acid in water at different pH and in the presence of salts: insights from the integration of experimental data and theoretical cluster models
Source: Royal Society of Chemistry journal article supplement (doi:10.1039/c9cp06728k), 2020-01-01
Supplement: c9cp06728k1.pdf [file c9cp06728k1.pdf]

# Absorption Spectra of Benzoic Acid in Water at Different pH and in the Presence of Salts: Insights from the Integration of Experimental Data and Theoretical Cluster Models

Natalia V. Karimova<sup>1</sup>, Man Luo<sup>2</sup>, Vicki H. Grassian<sup>2,3</sup>, R. Benny Gerber<sup>1,4</sup>

<sup>1</sup>Department of Chemistry, University of California, Irvine, CA 92697, USA

<sup>2</sup>Department of Chemistry and Biochemistry, University of California, San Diego, CA 92093, USA

<sup>3</sup>Department of Nanoengineering and Scripps Institution of Oceanography, University of California, San Diego, CA 92093, USA

<sup>4</sup>Institute of Chemistry and Fritz Haber Research Center, Hebrew University of Jerusalem, Jerusalem 91904, Israel

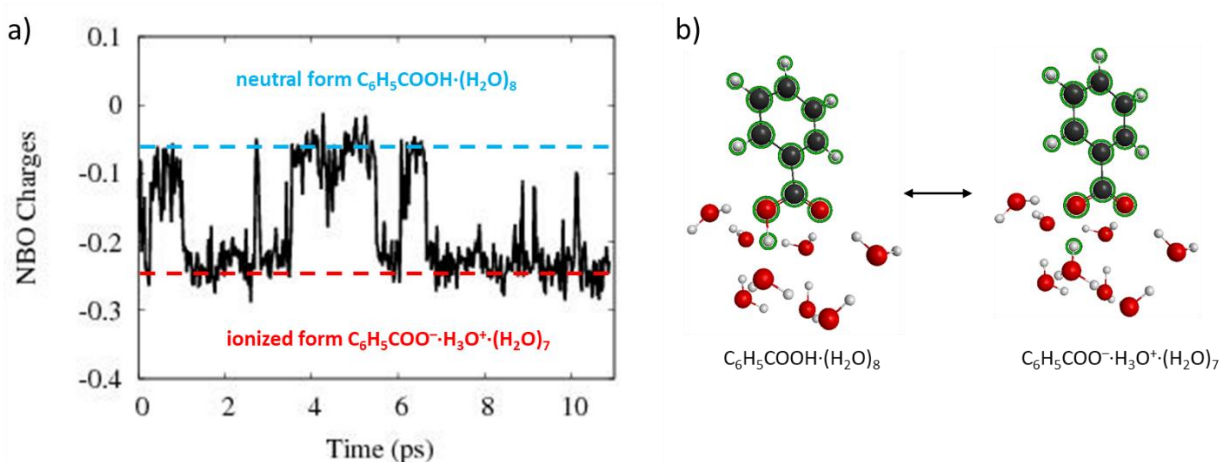

**Figure S1.** Proton transfer process between benzoic acid and water molecules  $C_6H_5COOH \cdot (H_2O)_8 \leftrightarrow C_6H_5COO^- \cdot H_3O^+ \cdot (H_2O)_7$ . (a) NBO charges of the fragments  $C_6H_5COOH/(C_6H_5COO \cdots H)$  stabilized by 8 water molecules; and (b) structures of  $C_6H_5COOH \cdot (H_2O)_8 \leftrightarrow C_6H_5COO^- \cdot H_3O^+ \cdot (H_2O)_7$ .

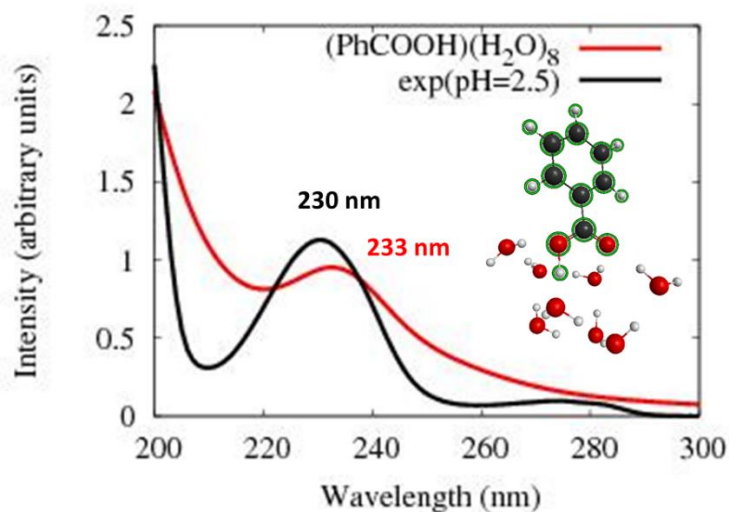

**Figure S2.** Comparison of the theoretical and experimental spectral data. Theoretical spectrum presented here is an average spectrum of all structures along AIMD trajectories. Optical absorption spectra of  $\text{C}_6\text{H}_5\text{COOH} \cdot (\text{H}_2\text{O})_8$  versus the experimental data at pH 2.5. Method B3LYP/6-31+G\*. Theory – red curve, experiment – black.

**Table S1.** Experimental (in water at pH 2.5) and theoretical optical absorption spectral data for benzoic acid (where the  $\Delta(E_B-E_C)$  is the energy gap between the maximums of C- and B-bands).

| Basis Set   | Peak Maximum   |         | $\Delta(E_B-E_C)$ |
|-------------|----------------|---------|-------------------|
|             | C-band         | B-band  |                   |
| ADC(3)      |                |         |                   |
| 6-31+G*     | 4.71 eV        | 5.73 eV | 1.02 eV           |
| 6-311+G*    | 4.71 eV        | 5.69 eV | 0.98 eV           |
| 6-311++G**  | 4.70 eV        | 5.69 eV | 0.99 eV           |
| ADC(2)      |                |         |                   |
| 6-31+G*     | 4.98 eV        | 5.91 eV | 0.93 eV           |
| 6-311+G*    | 4.96 eV        | 5.85 eV | 0.89 eV           |
| 6-311++G**  | 4.95 eV        | 5.84 eV | 0.89 eV           |
| B3LYP       |                |         |                   |
| 6-31+G*     | 4.87 eV        | 5.38 eV | 0.51 eV           |
| 6-311+G*    | 4.85 eV        | 5.37 eV | 0.52 eV           |
| 6-311++G**  | 4.85 eV        | 5.36 eV | 0.51 eV           |
| aug-cc-pVTZ | 4.85 eV        | 5.36 eV | 0.51 eV           |
| aug-cc-pVQZ | 4.85 eV        | 5.35 eV | 0.50 eV           |
|             |                |         |                   |
| Experiment  | 4.35 – 4.50 eV | 5.40 eV | 0.9 ÷ 1.05 eV     |
